# Supplementary material
Source: ML conference proceedings conference paper supplement (https://proceedings.neurips.cc/paper_files/paper/2023/hash/fa68ea2ff794ce792a688dec82c04f49-Abstract.html)
Supplement: Supplementary file 1 [file fa68ea2ff794ce792a688dec82c04f49-Supplemental-Conference.zip]

Archive with 1 entries (1 files):
- Shape_Completion_NeurIPS_2023_Submission-Supplemental-Camera-Ready.pdf
